# Supplementary material for: A seamless ensemble-based reconstruction of surface ocean p CO 2 and air–sea CO 2 fluxes over the global coastal and open oceans
Source: Copernicus journal article supplement (doi:10.5194/bg-19-1087-2022), 2022-02-21
Supplement: Supplementary file [file bg-19-1087-2022-supplement.pdf]

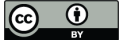

*Supplement of*

**A seamless ensemble-based reconstruction of surface ocean  $p\text{CO}_2$  and air–sea  $\text{CO}_2$  fluxes over the global coastal and open oceans**

**Thi Tuyet Trang Chau et al.**

*Correspondence to:* Thi Tuyet Trang Chau ([trang.chau@lsce.ipsl.fr](mailto:trang.chau@lsce.ipsl.fr))

The copyright of individual parts of the supplement might differ from the article licence.

**Table S1.** Input fields for the CMEMS-LSCE-FFNN reconstruction of sea surface partial pressure of CO<sub>2</sub> ( $p\text{CO}_2$ ) and air–sea CO<sub>2</sub> fluxes ( $fg\text{CO}_2$ ) over the global ocean in 1985–2019.

| Variables |                                                             | Products                                                                                                                                                                                                                                                                                                                                                                                                                                                                                                                                                                                 | References                                          |
|-----------|-------------------------------------------------------------|------------------------------------------------------------------------------------------------------------------------------------------------------------------------------------------------------------------------------------------------------------------------------------------------------------------------------------------------------------------------------------------------------------------------------------------------------------------------------------------------------------------------------------------------------------------------------------------|-----------------------------------------------------|
| 1         | CO <sub>2</sub> fugacity                                    | SOCATv2020, 1985-2019 ( <a href="https://www.socat.info/">https://www.socat.info/</a> , <a href="https://doi.org/10.25921/4xkx-ss49">https://doi.org/10.25921/4xkx-ss49</a> , last access 16/6/2020)                                                                                                                                                                                                                                                                                                                                                                                     | Bakker et al. (2016)                                |
| 2         | Sea surface salinity (SSS)                                  | CMEMS ARMOR3D L4, 1993-2019                                                                                                                                                                                                                                                                                                                                                                                                                                                                                                                                                              | Guinehut et al. (2012)                              |
| 3         | Sea surface height (SSH)                                    | ( <a href="https://resources.marine.copernicus.eu/?option=com_csw&amp;view=details&amp;product_id=MULTIOBS_GLO_PHY_TSUV_3D_MYNRT_015_012">https://resources.marine.copernicus.eu/?option=com_csw&amp;view=details&amp;product_id=MULTIOBS_GLO_PHY_TSUV_3D_MYNRT_015_012</a> )                                                                                                                                                                                                                                                                                                            | Mulet et al. (2012)                                 |
| 4         | Sea surface temperature (SST)                               | CMEMS ARMOR3D L4, 1993-2019; OSTIA L4*, 1985-1992 ( <a href="https://resources.marine.copernicus.eu/?option=com_csw&amp;view=details&amp;product_id=SST_GLO_SST_L4_REP_OBSERVATIONS_010_011">https://resources.marine.copernicus.eu/?option=com_csw&amp;view=details&amp;product_id=SST_GLO_SST_L4_REP_OBSERVATIONS_010_011</a> )                                                                                                                                                                                                                                                        | Good et al. (2020)*                                 |
| 5         | Mixed layer depth (MLD)                                     | ECCO2, 1992-2019 ( <a href="https://ecco.jpl.nasa.gov">https://ecco.jpl.nasa.gov</a> )                                                                                                                                                                                                                                                                                                                                                                                                                                                                                                   | Menemenlis et al. (2008)                            |
| 6         | Chlorophyll (CHL)                                           | GLOCOLOUR, 1998-2019 ( <a href="https://www.globcolour.info/">https://www.globcolour.info/</a> )                                                                                                                                                                                                                                                                                                                                                                                                                                                                                         | Maritorena et al. (2010)                            |
| 7         | CO <sub>2</sub> mole fraction ( $x\text{CO}_2$ )            | CAMS CO <sub>2</sub> atmospheric inversion, 1985-2019 ( <a href="https://atmosphere.copernicus.eu/">https://atmosphere.copernicus.eu/</a> )                                                                                                                                                                                                                                                                                                                                                                                                                                              | Chevallier et al. (2005, 2010)<br>Chevallier (2013) |
| 8         | $p\text{CO}_2$ climatology ( $p\text{CO}_2^{\text{clim}}$ ) | LDEO ( <a href="https://www.ldeo.columbia.edu/res/pi/CO2/">https://www.ldeo.columbia.edu/res/pi/CO2/</a> )                                                                                                                                                                                                                                                                                                                                                                                                                                                                               | Takahashi et al. (2009)                             |
| 9         | 6-hourly 10m winds                                          | ERA5, 1985-2019                                                                                                                                                                                                                                                                                                                                                                                                                                                                                                                                                                          | Hersbach et al. (2020)                              |
| 10        | Total pressure                                              | ( <a href="https://www.ecmwf.int/en/forecasts/datasets/reanalysis-datasets/era5">https://www.ecmwf.int/en/forecasts/datasets/reanalysis-datasets/era5</a> )                                                                                                                                                                                                                                                                                                                                                                                                                              |                                                     |
| 11        | Sea ice fraction ( $f_{\text{ice}}$ )                       | CMEMS OSTIA L4, 1985-2019, ( <a href="https://resources.marine.copernicus.eu/?option=com_csw&amp;view=details&amp;product_id=SST_GLO_SST_L4_REP_OBSERVATIONS_010_011">https://resources.marine.copernicus.eu/?option=com_csw&amp;view=details&amp;product_id=SST_GLO_SST_L4_REP_OBSERVATIONS_010_011</a> , <a href="https://resources.marine.copernicus.eu/?option=com_csw&amp;view=details&amp;product_id=SST_GLO_SST_L4_NRT_OBSERVATIONS_010_001">https://resources.marine.copernicus.eu/?option=com_csw&amp;view=details&amp;product_id=SST_GLO_SST_L4_NRT_OBSERVATIONS_010_001</a> ) | Good et al. (2020)                                  |

\*\*For some data unavailable before 1998, climatologies based on all available data were used as predictors. Exceptionally, predictors for SSH before 1993 are climatologies plus a linear trend in order to retain the overall response to the global warming. MLD before 1992 was taken as the average MLD between 1992 and 1997.

**Table S2.** Skill scores of the CMEMS-LSCE-FFNN reconstruction for different RECCAP regions. Validation between the reconstructed  $p\text{CO}_2$  ( $\mu\text{atm}$ ),  $fg\text{CO}_2$  ( $\text{molC m}^{-2}\text{yr}^{-1}$ ), and the corresponding fields computed from the monthly gridded SOCATv2020 data over the full period 1985 – 2019. Statistical metrics include Root Mean Square Deviation (RMSD) and coefficient of determination ( $r^2$ ).

| Regions                      | Number of data |       | RMSD $_{p\text{CO}_2}$ |       | $r^2_{p\text{CO}_2}$ |      | RMSD $_{fg\text{CO}_2}$ |      | $r^2_{fg\text{CO}_2}$ |      |
|------------------------------|----------------|-------|------------------------|-------|----------------------|------|-------------------------|------|-----------------------|------|
|                              | O              | C     | O                      | C     | O                    | C    | O                       | C    | O                     | C    |
| Globe (G)                    | 270228         | 31221 | 17.87                  | 35.86 | 0.78                 | 0.70 | 0.93                    | 1.91 | 0.79                  | 0.64 |
| 1 Arctic (Ar)                | 1170           | 449   | 33.01                  | 30.65 | 0.61                 | 0.44 | 1.11                    | 0.93 | 0.70                  | 0.77 |
| 2 Subpolar Atlantic (SpA)    | 24433          | 12249 | 23.68                  | 30.35 | 0.76                 | 0.79 | 1.35                    | 1.66 | 0.69                  | 0.75 |
| 3 Subpolar Pacific (SpP)     | 10840          | 3596  | 29.08                  | 54.69 | 0.64                 | 0.57 | 1.80                    | 2.70 | 0.66                  | 0.54 |
| 4 Subtropical Atlantic (StA) | 50113          | 5205  | 15.24                  | 34.74 | 0.76                 | 0.51 | 0.77                    | 2.39 | 0.77                  | 0.37 |
| 5 Subtropical Pacific (StP)  | 67950          | 853   | 17.15                  | 47.29 | 0.78                 | 0.45 | 0.81                    | 2.08 | 0.84                  | 0.48 |
| 6 Equatorial Atlantic (EA)   | 11574          | 469   | 14.11                  | 36.03 | 0.69                 | 0.25 | 0.53                    | 1.14 | 0.64                  | 0.36 |
| 7 Equatorial Pacific (EP)    | 45590          | 221   | 16.68                  | 27.17 | 0.80                 | 0.41 | 0.57                    | 0.84 | 0.81                  | 0.38 |
| 8 South Atlantic (SA)        | 4577           | 562   | 14.09                  | 37.98 | 0.77                 | 0.46 | 0.71                    | 2.00 | 0.78                  | 0.42 |
| 9 South Pacific (SP)         | 17074          | 1181  | 11.50                  | 14.38 | 0.76                 | 0.60 | 0.56                    | 0.71 | 0.79                  | 0.62 |
| 10 Indian Ocean (IO)         | 7792           | 588   | 14.60                  | 18.37 | 0.80                 | 0.65 | 1.02                    | 0.91 | 0.78                  | 0.68 |
| 11 Southern Ocean (SO)       | 29115          | 5848  | 19.18                  | 35.73 | 0.62                 | 0.65 | 1.24                    | 1.64 | 0.53                  | 0.64 |

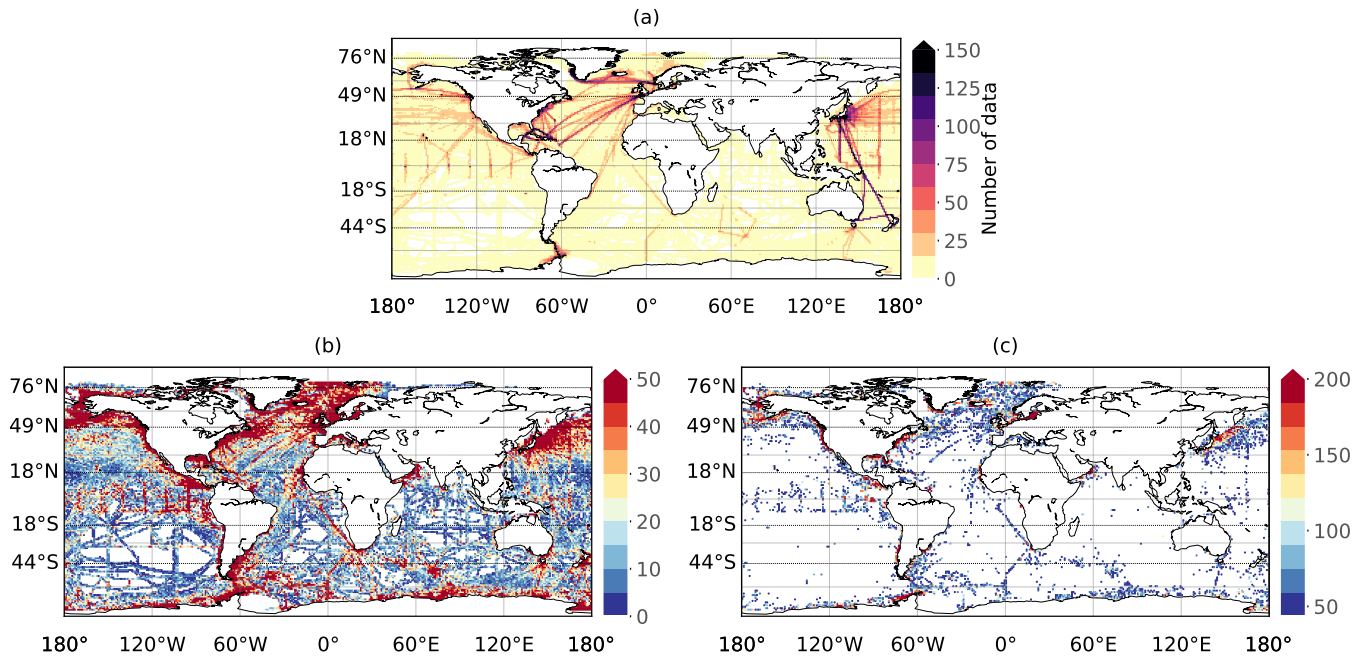

**Figure S1.** (a) Spatial distribution of monthly gridded SOCATv2020 data. (b,c) Maximal variability of  $p\text{CO}_2$  individual data within a  $1^\circ \times 1^\circ$ -grid box ( $\mu\text{atm}$ ), i.e.  $\max_t \{p\text{CO}_{2,tij}^{\max} - p\text{CO}_{2,tij}^{\min}\}$ , where  $t$  and  $ij$  indicate time and space indices.  $p\text{CO}_{2,tij}^{\max}$  and  $p\text{CO}_{2,tij}^{\min}$  were converted from the corresponding values of  $\text{CO}_2$  fugacity observations in the monthly gridded SOCATv2020 database. Fig. S1c shows the distribution of the variability larger than the 80%-quantile.

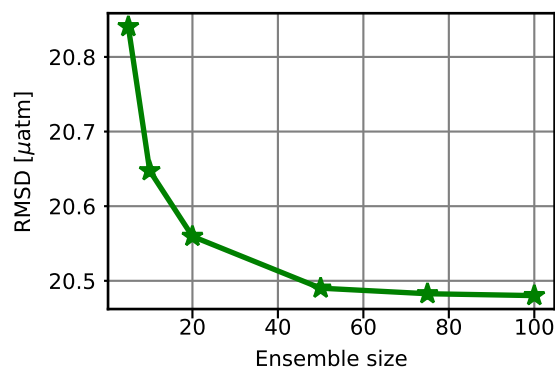

**Figure S2.** RMSD between a best estimate (ensemble mean) and SOCAT data of ocean surface  $p\text{CO}_2$  with respect to the ensemble size in  $\{5, 10, 20, 50, 75, 100\}$ .

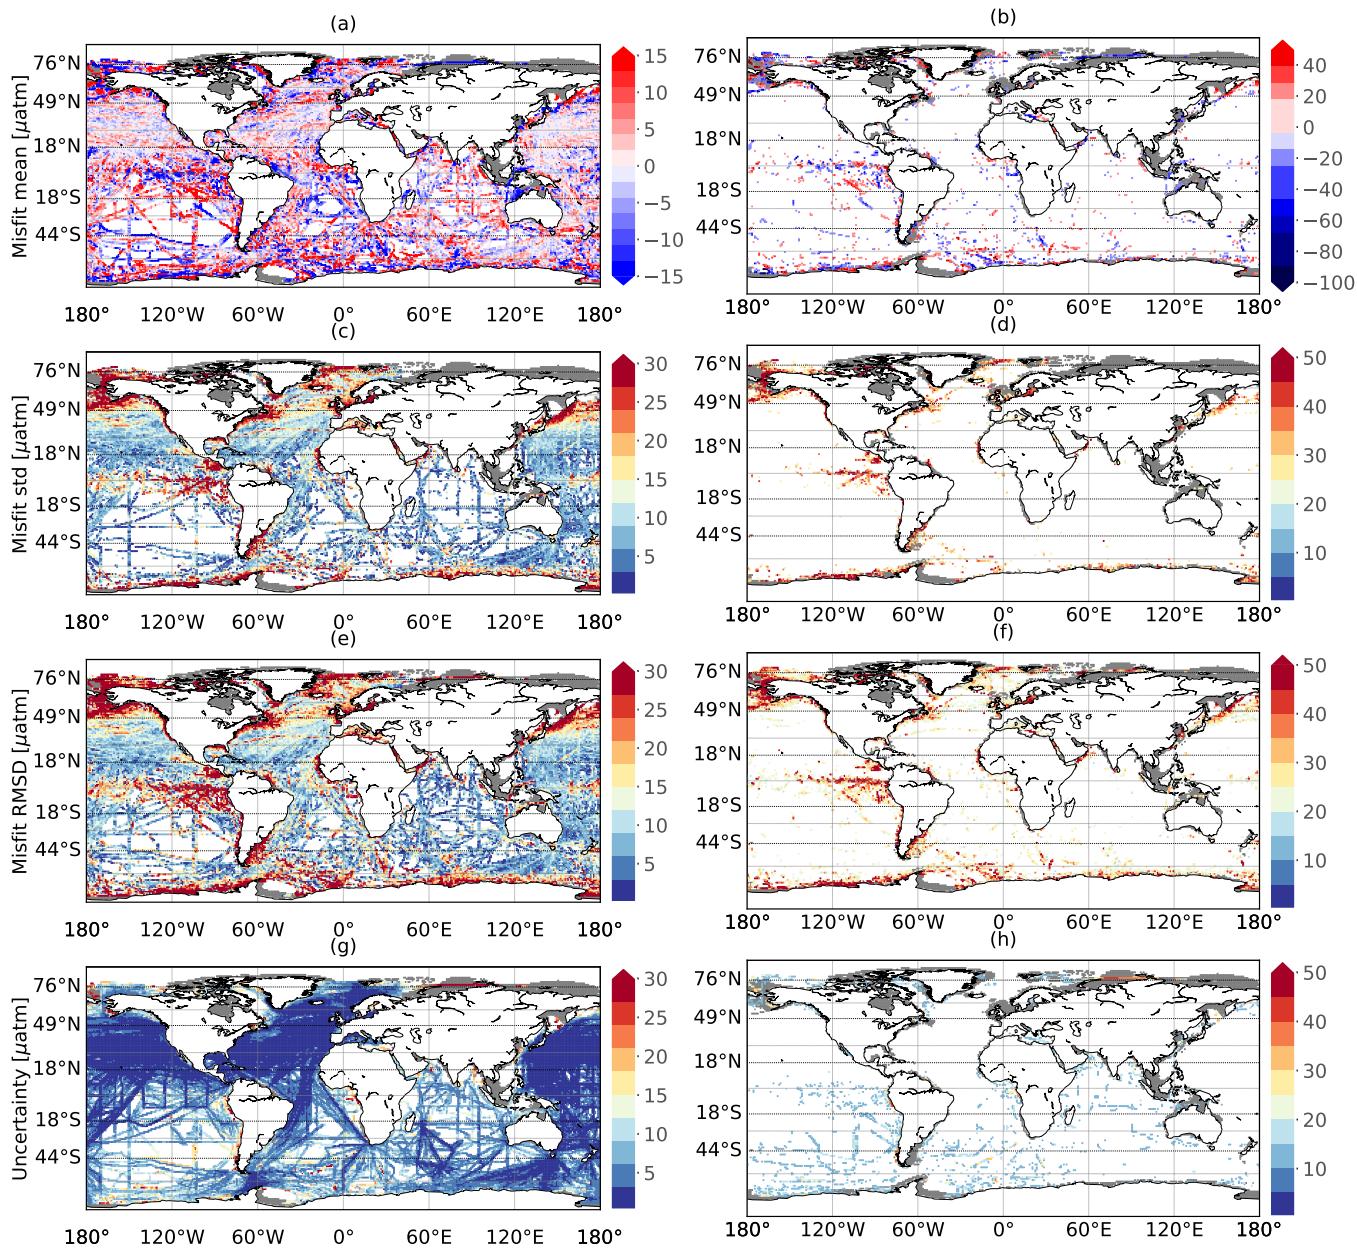

**Figure S3.** Temporal mean (a,b), standard deviation (c,d), and RMSD (e,f) of model-minus-data misfits between the reconstructed  $p\text{CO}_2$  and SOCAT data; and model uncertainty (g,h), i.e. ensemble standard deviation of temporal mean estimates at SOCAT grid boxes. The right column plots show statistics falling out of the 90% quantile range for (b), or larger than the 90%-quantile for (d,f,h).

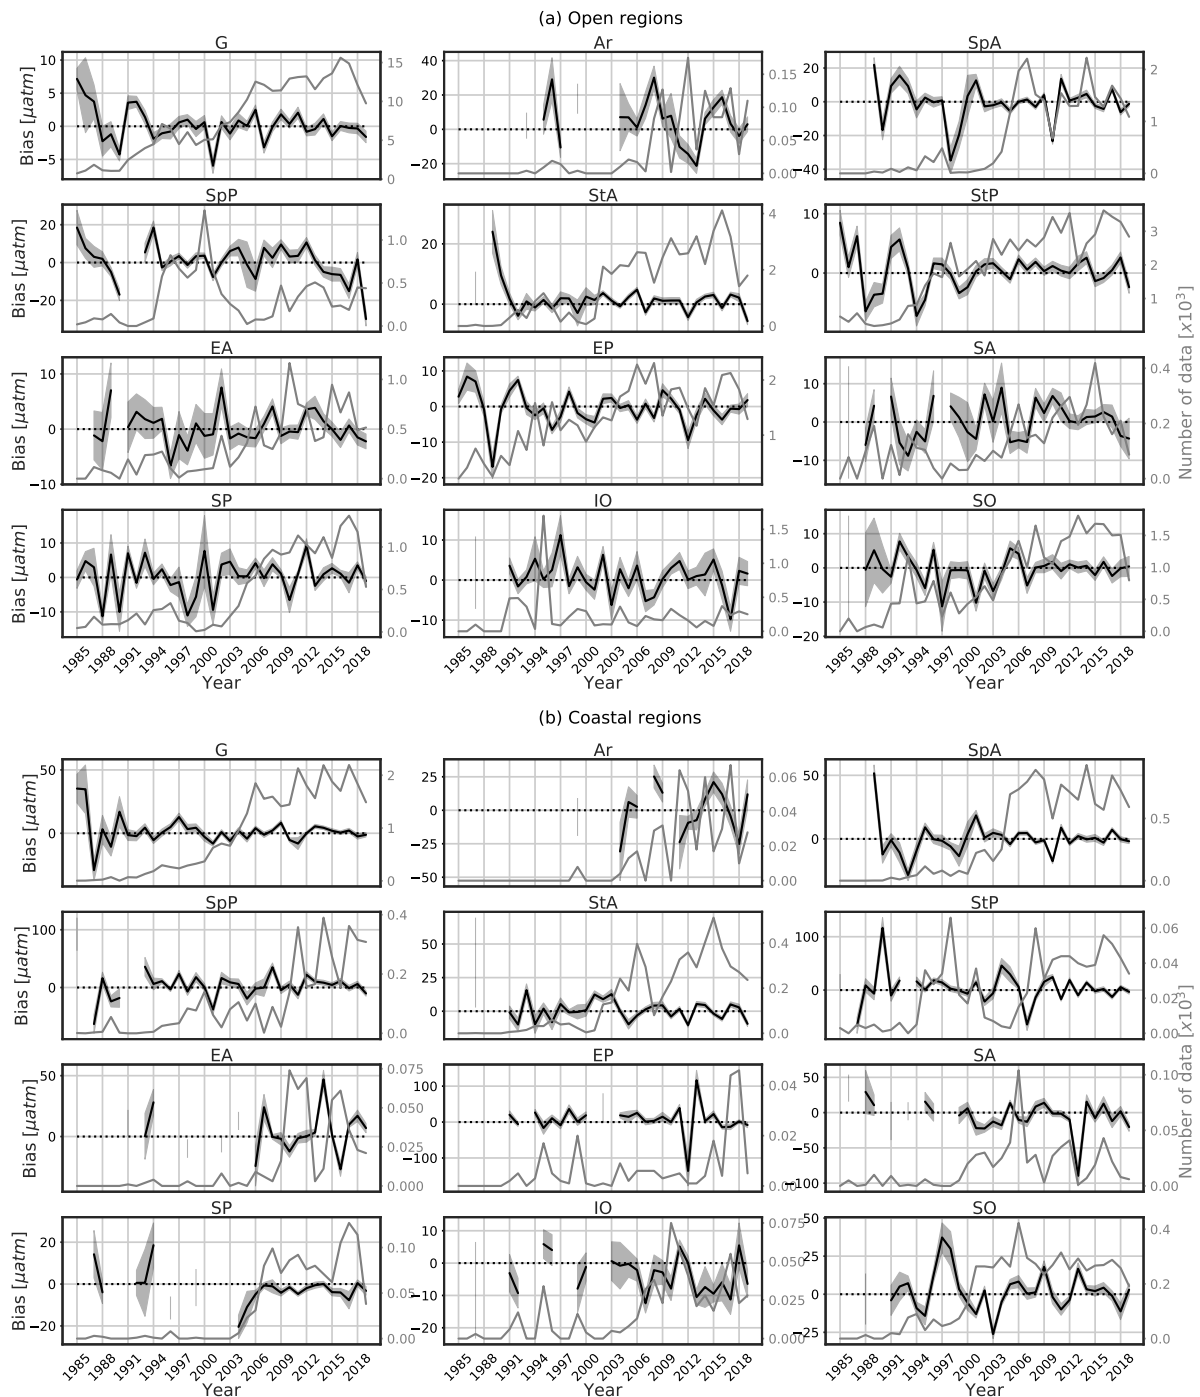

**Figure S4.** Time series of the yearly mean bias between the reconstructed  $pCO_2$  data and SOCATv2020 data over the open ocean and coastal area (black curve) and of the total number of monthly gridded data used in the FFNN model construction (light grey curve). The grey area represents the  $1\sigma$ -envelop of the errors derived from the 100-member ensemble.

**Table S3.** Names, locations, and time length of moored time series of  $p\text{CO}_2$  observations (Sutton et al., 2019) sampled over the open ocean (O) and coastal ocean (C).

| Stations      |                  | Coordinates                                                                        | Time span       |                 |
|---------------|------------------|------------------------------------------------------------------------------------|-----------------|-----------------|
| Abbreviations | Names            | (Latitude, Longitude)                                                              |                 |                 |
| (O)           | 1. ALAWAI        | Ala Wai Water Quality Buoy Pacific island                                          | 21.3°N, 157.9°W | 6/2008–12/2013  |
|               | 2. BOBOA         | Bay of Bengal Ocean Indian Ocean                                                   | 15.0°N, 90.0°E  | 11/2013–12/2016 |
|               | 3. BTM           | Bermuda Testbed Mooring                                                            | 31.5°N, 64.2°W  | 10/2005–12/2006 |
|               | 4. CCE1          | California Current Ecosystem 1                                                     | 33.5°N, 122.5°W | 11/2008–12/2013 |
|               | 5. CHUUK         | Chuuk Lagoon Ocean Acidification Mooring                                           | 7.5°N, 151.9°E  | 11/2011–12/2014 |
|               | 6. CRESCENTREEF  | Crescent Reef Bermuda Buoy                                                         | 32.4°N, 64.8°W  | 11/2010–12/2014 |
|               | 7. CRIMP2        | Coral Reef Instrumented Monitoring Platform 2                                      | 21.5°N, 157.8°W | 6/2008–12/2014  |
|               | 8. HOGREEF       | Hog Reef Bermuda Buoy                                                              | 32.5°N, 64.8°W  | 12/2010–12/2014 |
|               | 9. KANEHOE       | Kaneohe Bay Ocean Acidification Offshore Observatory                               | 21.5°N, 157.8°W | 9/2011–5/2015   |
|               | 10. KEO          | Kuroshio Extension Observatory                                                     | 32.3°N, 144.6°E | 9/2007–12/2014  |
|               | 11. KILONALU     | Kilo Nalu Water Quality Buoy at South Shore Oahu                                   | 21.3°N, 157.9°W | 8/2008–12/2016  |
|               | 12. NH10         | Newport Hydrographic Line Station 10 Ocean Acidification Mooring                   | 44.9°N, 124.8°W | 4/2014–12/2014  |
|               | 13. PAPA         | Ocean Station Papa                                                                 | 50.1°N, 144.8°W | 6/2007–12/2014  |
|               | 14. SOFS         | Southern Ocean Flux Station                                                        | 46.8°S, 142.0°E | 11/2011–9/2012  |
|               | 15. STRATUS      | Stratus                                                                            | 19.7°S, 85.6°W  | 10/2006–12/2014 |
|               | 16. TAO110W      | National Data Buoy Center (NDBC) Tropical Atmosphere Ocean                         | 0.0°N, 110.0°W  | 9/2009–12/2016  |
|               | 17. TAO125W      | NDBC Tropical Atmosphere Ocean                                                     | 0.0°N, 125.0°W  | 5/2004–12/2016  |
|               | 18. TAO140W      | NDBC Tropical Atmosphere Ocean                                                     | 0.0°N, 140.0°W  | 5/2004–4/2012   |
|               | 19. TAO155W      | NDBC Tropical Atmosphere Ocean                                                     | 0.0°N, 155.0°W  | 1/2010–12/2013  |
|               | 20. TAO165E      | NDBC Tropical Atmosphere Ocean                                                     | 0.0°N, 165.0°E  | 2/2010–11/2011  |
|               | 21. TAO170W      | NDBC Tropical Atmosphere Ocean                                                     | 0.0°N, 170.0°W  | 7/2005–12/2011  |
|               | 22. TAO8S165E    | NDBC Tropical Atmosphere Ocean                                                     | 8.0°S, 165.0°E  | 6/2009–12/2010  |
|               | 23. WHOTS        | Woods Hole Oceanographic Institution Hawaii Ocean Time-series Station              | 22.7°N, 158.0°W | 12/2004–12/2014 |
| (C)           | 1. CAPEELIZABETH | NDBC Buoy 46041 in Olympic Coast National Marine Sanctuary (NMS)                   | 47.4°N, 124.7°W | 6/2006–12/2014  |
|               | 2. CCE2          | California Current Ecosystem 2                                                     | 34.3°N, 120.8°W | 1/2010–12/2014  |
|               | 3. CHABA         | Chá b'a Buoy in the Northwest Enhanced Moored Observatory and Olympic Coast NMS    | 48.0°N, 126.0°W | 7/2010–11/2015  |
|               | 4. CHEECAROCKS   | Cheeca Rocks Ocean Acidification Mooring in Florida Keys National Marine Sanctuary | 24.9°N, 80.6°W  | 12/2011–12/2015 |
|               | 5. COASTALMS     | Central Gulf of Mexico Ocean Observing System Station 01                           | 30.0°N, 88.6°W  | 5/2009–5/2014   |
|               | 6. GAKOA         | Gulf of Alaska Ocean Acidification Mooring                                         | 59.9°N, 149.4°W | 5/2011–12/2016  |
|               | 7. GRAYSREEF     | NDBC Buoy 41008 in Gray's Reef National Marine Sanctuary                           | 31.4°N, 80.9°W  | 7/2006–12/2014  |
|               | 8. GULFOFMAINE   | Coastal Western Gulf of Maine Mooring                                              | 43.0°N, 70.5°W  | 7/2006–12/2014  |
|               | 9. ICELAND       | North Atlantic Ocean Acidification Mooring                                         | 68.0°N, 12.7°W  | 8/2013–11/2014  |
|               | 10. KODIAK       | Kodiak Alaska Ocean Acidification Mooring                                          | 57.7°N, 152.3°W | 3/2013–12/2015  |
|               | 11. LAPARGUERA   | La Parguera Ocean Acidification Mooring                                            | 18.0°N, 67.1°W  | 1/2009–12/2016  |
|               | 12. M2           | Southeastern Bering Sea Mooring Site 2                                             | 56.5°N, 164.0°W | 5/2013–9/2015   |
|               | 13. SEAK         | Southeast Alaska Ocean Acidification Mooring                                       | 56.3°N, 134.7°W | 3/2013–12/2015  |

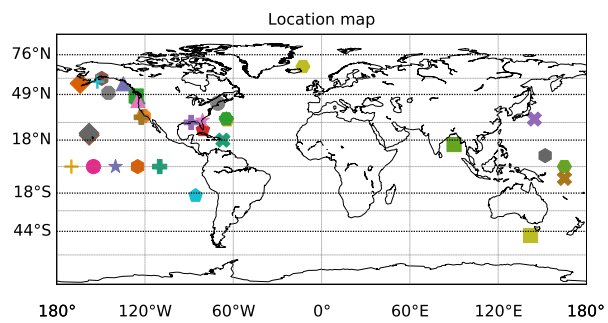

**Figure S5.** Location map of in situ measurements of ocean surface  $p\text{CO}_2$  (Sutton et al., 2019).

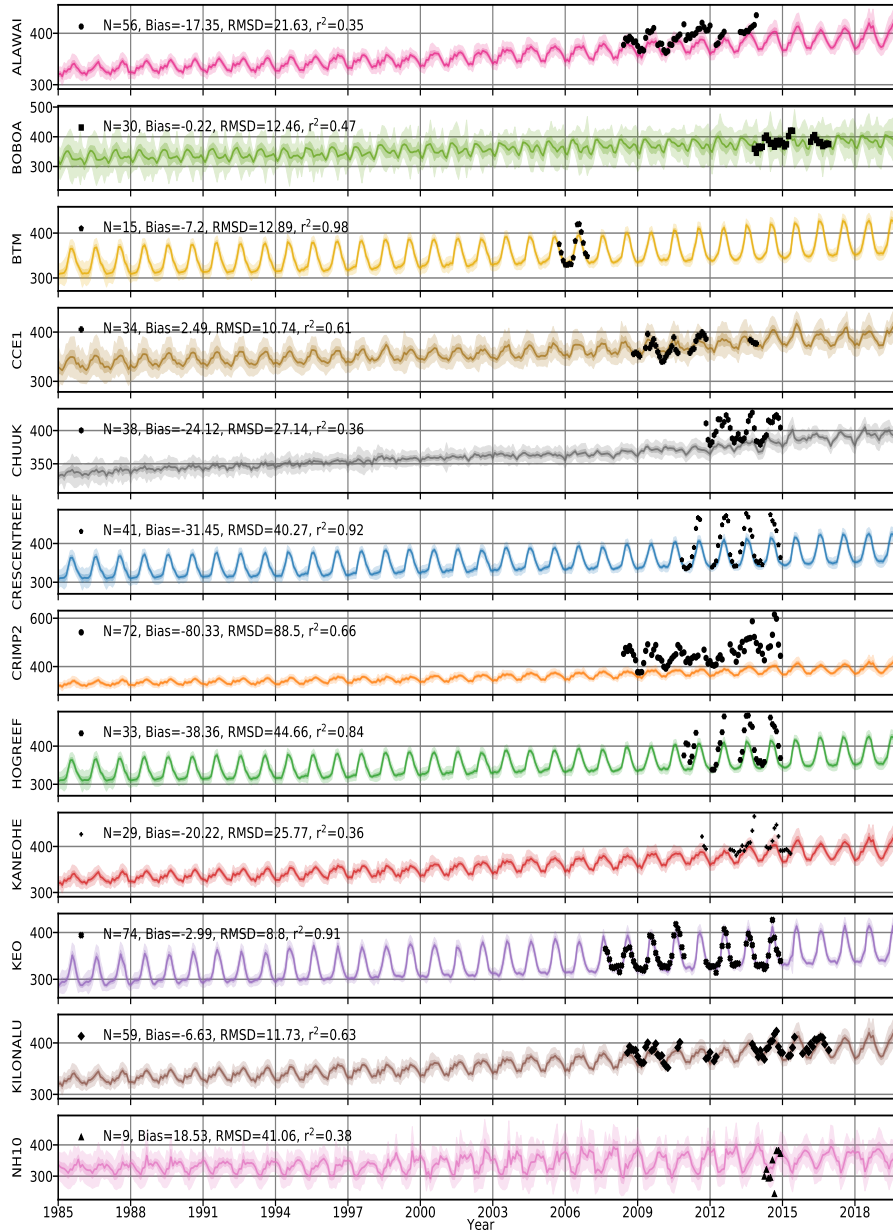

**Figure S6.** Time series of open ocean surface  $p\text{CO}_2$  at different stations - part 1 (see station locations in Fig. S5 and Table S3). Evaluation data are monthly averages of measurements at each station (Sutton et al., 2019). The ensemble mean  $\mu_{\text{ensemble}}$  and ensemble spread  $\sigma_{\text{ensemble}}$  (Eq. 2) are computed from reconstructed data at the four nearest neighbors of that location. Number of grid boxes with observations  $N$ , model bias  $\mu_{\text{misfit}}$  (Eq. 3), RMSD (Eq. 4), and model–data correlation  $r^2$  have been computed on these monthly interpolated data. In each subplot, dots stand for observation–based data and the coloured line with shaded areas stand for the mean and uncertainty envelopes computed from the CMEMS-LSCE-FFNN 100-member ensemble (dark: 68% confidence interval, i.e.  $\mu_{\text{ensemble}} \pm \sigma_{\text{ensemble}}$ ; light: 99% confidence interval, i.e.  $\mu_{\text{ensemble}} \pm 3\sigma_{\text{ensemble}}$ ).



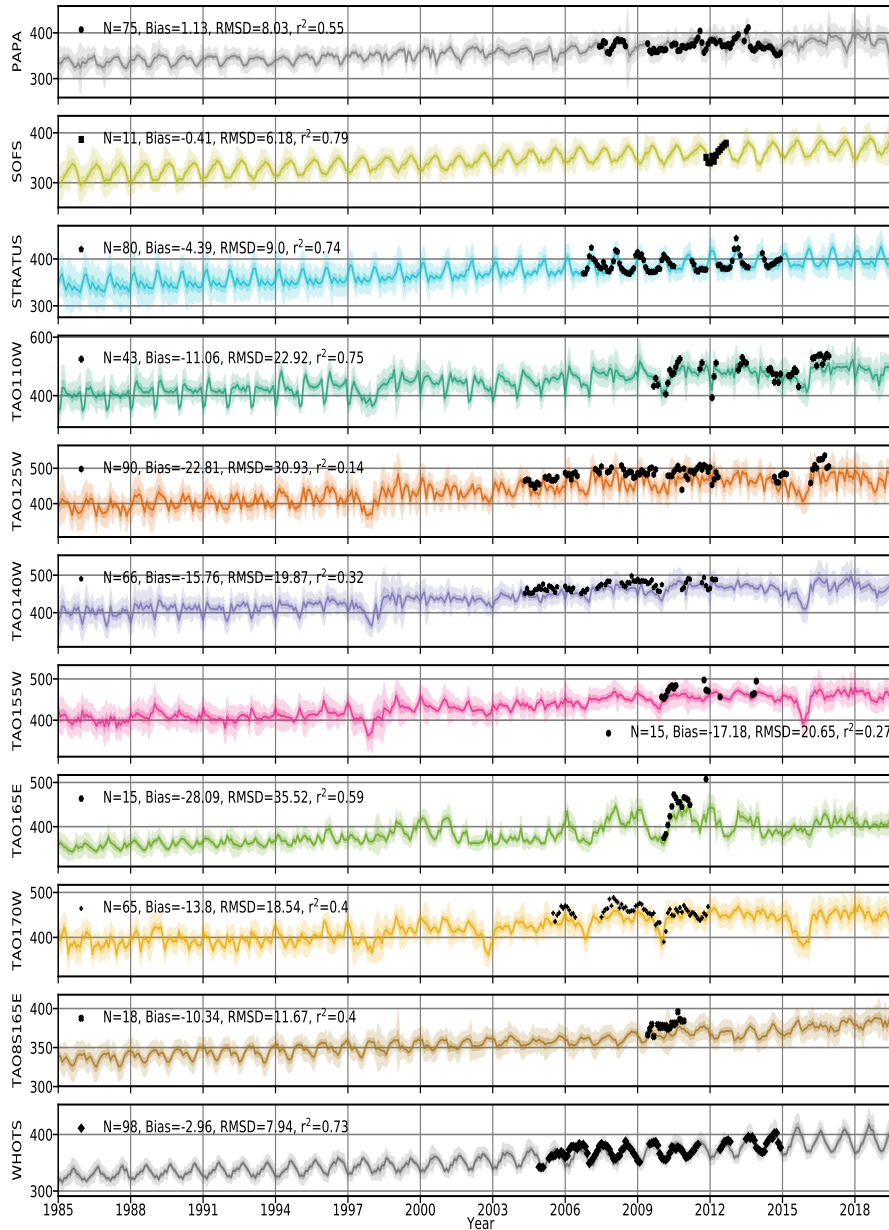

**Figure S7.** Time series of open ocean surface  $p\text{CO}_2$  at different stations - part 2 (see station locations in Fig. S5 and Table S3). Evaluation data are monthly averages of measurements at each station (Sutton et al., 2019). The ensemble mean  $\mu_{\text{ensemble}}$  and ensemble spread  $\sigma_{\text{ensemble}}$  (Eq. 2) are computed from reconstructed data at the four nearest neighbors of that location. Number of grid boxes with observations  $N$ , model bias  $\mu_{\text{misfit}}$  (Eq. 3), RMSD (Eq. 4), and model–data correlation  $r^2$  have been computed on these monthly interpolated data. In each subplot, dots stand for observation–based data and the coloured line with shaded areas stand for the mean and uncertainty envelopes computed from the CMEMS-LSCE-FFNN 100-member ensemble (dark: 68% confidence interval, i.e.  $\mu_{\text{ensemble}} \pm \sigma_{\text{ensemble}}$ ; light: 99% confidence interval, i.e.  $\mu_{\text{ensemble}} \pm 3\sigma_{\text{ensemble}}$ ).

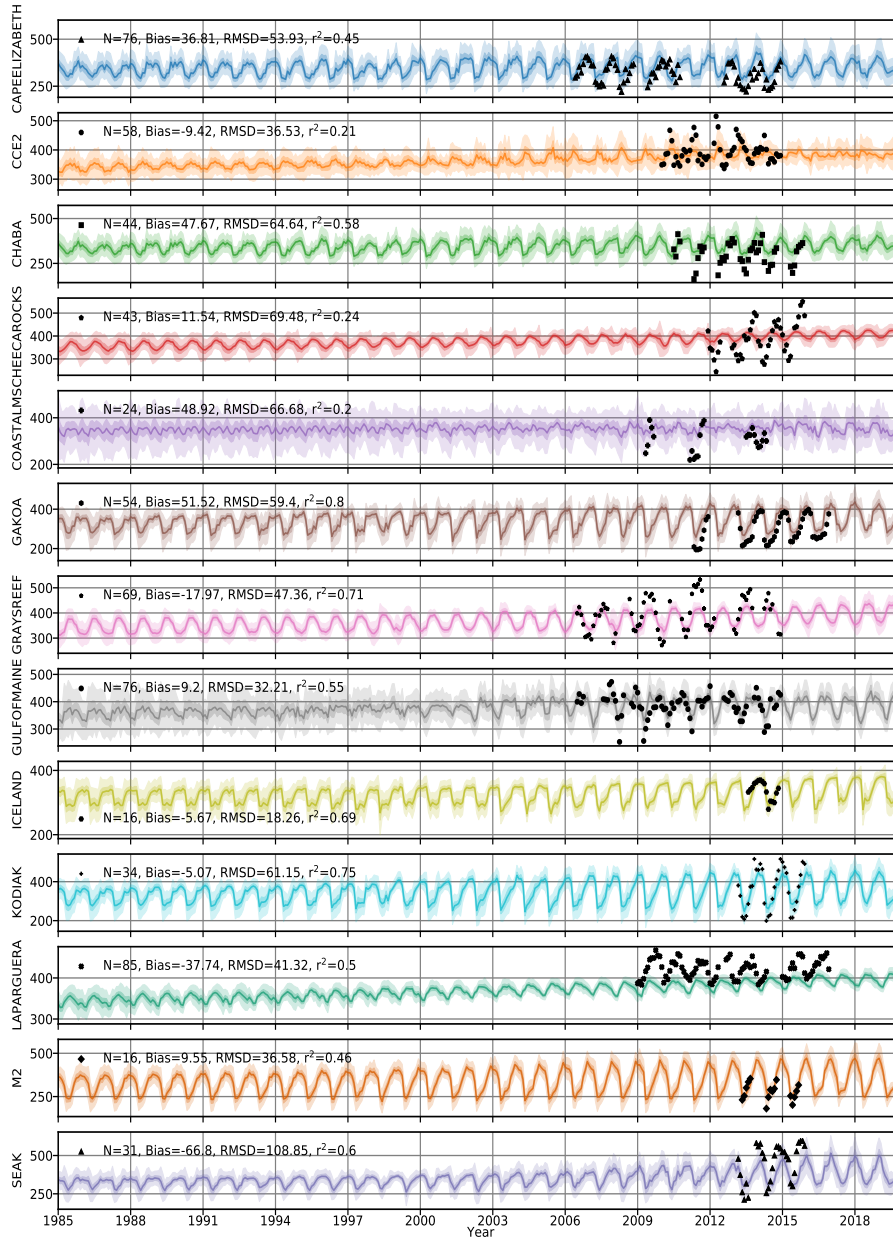

**Figure S8.** Time series of coastal ocean surface  $p\text{CO}_2$  at different stations (see station locations in Fig. S5). Evaluation data are monthly averages of measurements at each station (Sutton et al., 2019). The ensemble mean  $\mu_{\text{ensemble}}$  and ensemble spread  $\sigma_{\text{ensemble}}$  (Eq. 2) are computed from reconstructed data at the four nearest neighbors of that location. Number of grid boxes with observations  $N$ , model bias  $\mu_{\text{misfit}}$  (Eq. 3), RMSD (Eq. 4), and model–data correlation  $r^2$  have been computed on these monthly interpolated data. In each subplot, dots stand for observation–based data and the coloured line with shaded areas stand for the mean and uncertainty envelopes computed from the CMEMS-LSCE-FFNN 100-member ensemble (dark: 68% confidence interval, i.e.  $\mu_{\text{ensemble}} \pm \sigma_{\text{ensemble}}$ ; light: 99% confidence interval, i.e.  $\mu_{\text{ensemble}} \pm 3\sigma_{\text{ensemble}}$ ).

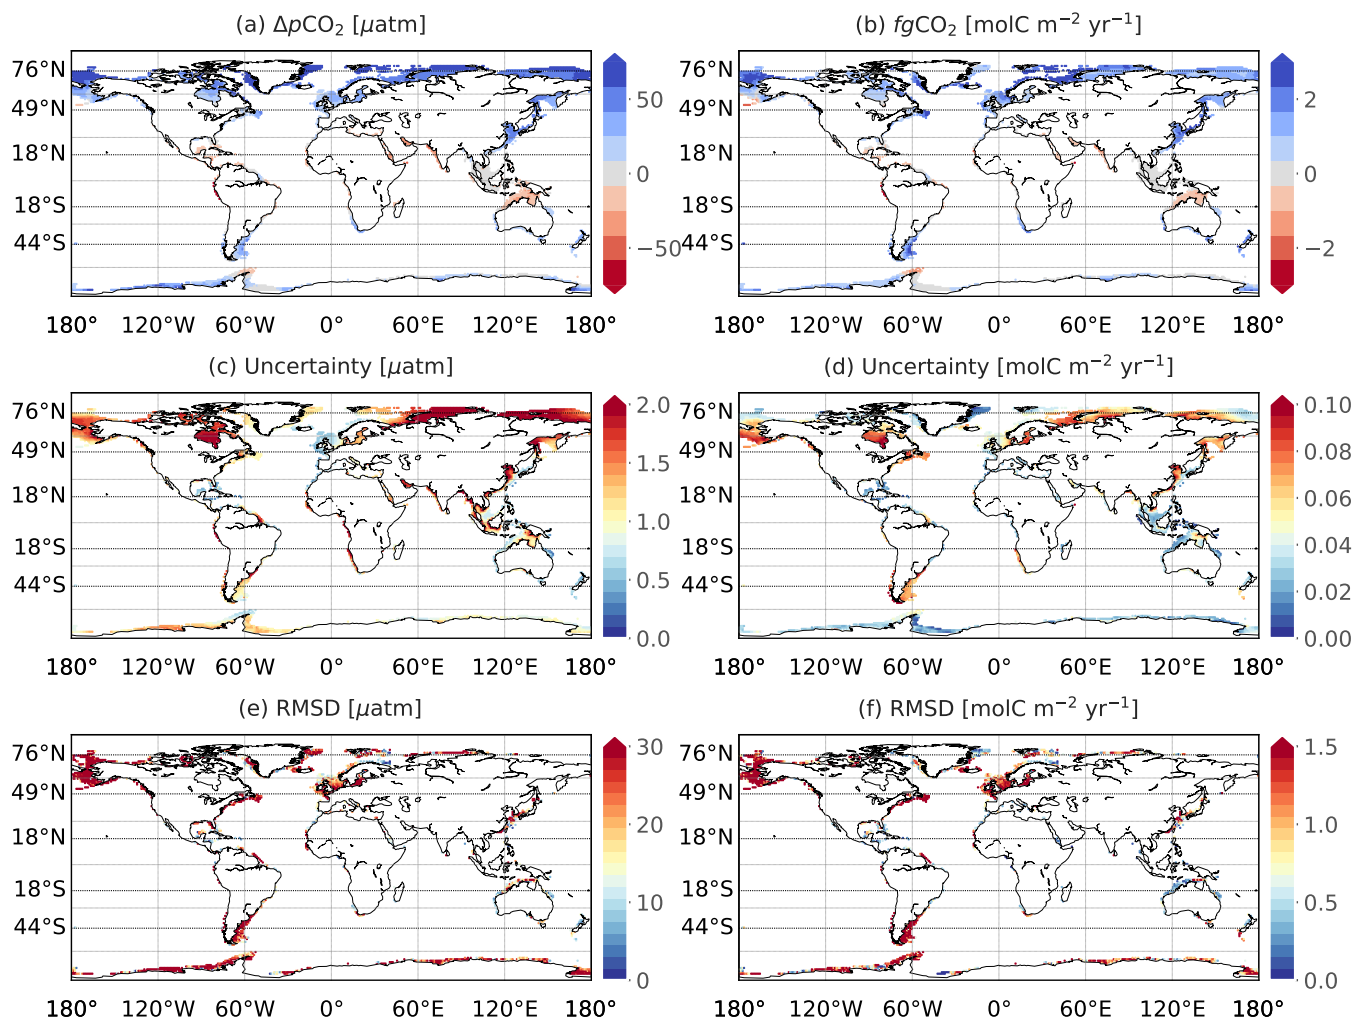

**Figure S9.** Climatological mean (top) and uncertainty (middle) of air-sea  $p\text{CO}_2$  difference (a, c) and of  $\text{CO}_2$  fluxes (b, d) over the coastal ocean for 1985-2019. Uncertainty is computed as standard deviation of the 100-member CMEMS-LSCE-FFNN model outputs of sea surface  $p\text{CO}_2$  and air-sea  $\text{CO}_2$  fluxes. The bottom plots (e, f) show RMSDs between the SOCAT data (or data-based estimates of fluxes for (f)) and the mean CMEMS-LSCE-FFNN model outputs.

## References

- Bakker, D. C. E., Pfeil, B., Landa, C. S., Metzl, N., O'Brien, K. M., Olsen, A., Smith, K., Cosca, C., Harasawa, S., Jones, S. D., Nakaoka, S., Nojiri, Y., Schuster, U., Steinhoff, T., Sweeney, C., Takahashi, T., Tilbrook, B., Wada, C., Wanninkhof, R., Alin, S. R., Balestrini, C. F., Barbero, L., Bates, N. R., Bianchi, A. A., Bonou, F., Boutin, J., Bozec, Y., Burger, E. F., Cai, W.-J., Castle, R. D., Chen, L., Chierici, M., Currie, K., Evans, W., Featherstone, C., Feely, R. A., Fransson, A., Goyet, C., Greenwood, N., Gregor, L., Hankin, S., Hardman-Mountford, N. J., Harlay, J., Hauck, J., Hoppema, M., Humphreys, M. P., Hunt, C. W., Huss, B., Ibáñez, J. S. P., Johannessen, T., Keeling, R., Kitidis, V., Körtzinger, A., Kozyr, A., Krasakopoulou, E., Kuwata, A., Landschützer, P., Lauvset, S. K., Lefèvre, N., Lo Monaco, C., Manke, A., Mathis, J. T., Merlivat, L., Millero, F. J., Monteiro, P. M. S., Munro, D. R., Murata, A., Newberger, T., Omar, A. M., Ono, T., Paterson, K., Pearce, D., Pierrot, D., Robbins, L. L., Saito, S., Salisbury, J., Schlitzer, R., Schneider, B., Schweitzer, R., Sieger, R., Skjelvan, I., Sullivan, K. F., Sutherland, S. C., Sutton, A. J., Tadokoro, K., Telszewski, M., Tuma, M., van Heuven, S. M. A. C., Vandemark, D., Ward, B., Watson, A. J., and Xu, S.: A multi-decade record of high-quality  $f\text{CO}_2$  data in version 3 of the Surface Ocean  $\text{CO}_2$  Atlas (SOCAT), *Earth Syst. Sci. Data*, 8, 383–413, <https://doi.org/10.5194/essd-8-383-2016>, 2016.
- Chevallier, F.: On the parallelization of atmospheric inversions of  $\text{CO}_2$  surface fluxes within a variational framework, *Geosci. Model Dev.*, 6, 783–790, <https://doi.org/10.5194/gmd-6-783-2013>, 2013.
- 15 Chevallier, F., Fisher, M., Peylin, P., Serrar, S., Bousquet, P., Bréon, F.-M., Chédin, A., and Ciais, P.: Inferring  $\text{CO}_2$  sources and sinks from satellite observations: Method and application to TOVS data, *J. Geophys. Res. Atmos.*, 110, <https://doi.org/https://doi.org/10.1029/2005JD006390>, 2005.
- Chevallier, F., Ciais, P., Conway, T. J., Aalto, T., Anderson, B. E., Bousquet, P., Brunke, E. G., Ciattaglia, L., Esaki, Y., Fröhlich, M., Gomez, A., Gomez-Pelaez, A. J., Haszpra, L., Krummel, P. B., Langenfelds, R. L., Leuenberger, M., Machida, T., Maignan, F., Matsueda, H., Morguí, J. A., Mukai, H., Nakazawa, T., Peylin, P., Ramonet, M., Rivier, L., Sawa, Y., Schmidt, M., Steele, L. P., Vay, S. A., Vermeulen, A. T., Wofsy, S., and Worthy, D.:  $\text{CO}_2$  surface fluxes at grid point scale estimated from a global 21 year reanalysis of atmospheric measurements, *J. Geophys. Res. Atmos.*, 115, <https://doi.org/https://doi.org/10.1029/2010JD013887>, 2010.
- Good, S., Fiedler, E., Mao, C., Martin, M. J., Maycock, A., Reid, R., Roberts-Jones, J., Searle, T., Waters, J., While, J., and Worsfold, M.: The current configuration of the OSTIA system for Operational Production of Foundation Sea Surface Temperature and Ice Concentration Analyses, *Remote Sens.*, 12, <https://www.mdpi.com/2072-4292/12/4/720>, 2020.
- Guinehut, S., Dhomps, A.-L., Larnicol, G., and Le Traon, P.-Y.: High resolution 3-D temperature and salinity fields derived from in situ and satellite observations, *Ocean Sci.*, 8, 845–857, <https://doi.org/10.5194/os-8-845-2012>, 2012.
- Hersbach, H., Bell, B., Berrisford, P., Hirahara, S., Horányi, A., Muñoz-Sabater, J., Nicolas, J., Peubey, C., Radu, R., Schepers, D., Simmons, A., Soci, C., Abdalla, S., Abellan, X., Balsamo, G., Bechtold, P., Biavati, G., Bidlot, J., Bonavita, M., De Chiara, G., Dahlgren, P., Dee, D., Diamantakis, M., Dragani, R., Flemming, J., Forbes, R., Fuentes, M., Geer, A., Haimberger, L., Healy, S., Hogan, R. J., Hólm, E., Janisková, M., Keeley, S., Laloyaux, P., Lopez, P., Lupu, C., Radnoti, G., de Rosnay, P., Rozum, I., Vamborg, F., Villaume, S., and Thépaut, J.-N.: The ERA5 global reanalysis, *Q. J. R. Meteorol. Soc.*, 146, 1999–2049, <https://doi.org/https://doi.org/10.1002/qj.3803>, 2020.
- Maritorena, S., d'Andon, O. H. F., Mangin, A., and Siegel, D. A.: Merged satellite ocean color data products using a bio-optical model: Characteristics, benefits and issues, *Remote Sens. Environ.*, 114, 1791–1804, <https://doi.org/https://doi.org/10.1016/j.rse.2010.04.002>, 2010.
- 35 Menemenlis, D., Campin, J., Heimbach, P., Hill, C., Lee, T., Nguyen, A., Schodlok, M., and Zhang, H.: ECCO2: High resolution global ocean and sea ice data synthesis, OS31C-1292, 2008.

- Mulet, S., Rio, M.-H., Mignot, A., Guinehut, S., and Morrow, R.: A new estimate of the global 3D geostrophic ocean circulation based on satellite data and in-situ measurements, *Deep Sea Res. 2 Top. Stud. Oceanogr.*, 77-80, 70–81, 40 <https://doi.org/https://doi.org/10.1016/j.dsr2.2012.04.012>, 2012.
- Sutton, A. J., Feely, R. A., Maenner-Jones, S., Musielwicz, S., Osborne, J., Dietrich, C., Monacci, N., Cross, J., Bott, R., Kozyr, A., et al.: Autonomous seawater  $p\text{CO}_2$  and  $p\text{H}$  time series from 40 surface buoys and the emergence of anthropogenic trends, *Earth Syst. Sci. Data*, 11, 421–439, 2019.
- Takahashi, T., Sutherland, S. C., Wanninkhof, R., Sweeney, C., Feely, R. A., Chipman, D. W., Hales, B., Friederich, G., Chavez, F., Sabine, C., 45 Watson, A., Bakker, D. C., Schuster, U., Metzl, N., Yoshikawa-Inoue, H., Ishii, M., Midorikawa, T., Nojiri, Y., Körtzinger, A., Steinhoff, T., Hoppema, M., Olafsson, J., Arnarson, T. S., Tilbrook, B., Johannessen, T., Olsen, A., Bellerby, R., Wong, C., Delille, B., Bates, N., and de Baar, H. J.: Climatological mean and decadal change in surface ocean  $p\text{CO}_2$ , and net sea–air  $\text{CO}_2$  flux over the global oceans, *Deep Sea Res. 2 Top. Stud. Oceanogr.*, 56, 554–577, <https://doi.org/https://doi.org/10.1016/j.dsr2.2008.12.009>, 2009.
